# Supplementary material for: Dispersive Magnetic Solid-Phase Extraction as a Novelty Sample Treatment for the Determination of the Main Aflatoxins in Paprika
Source: MDPI journal article supplement (doi:10.3390/toxins15020160), 2023-02-15
Supplement: s1 [file s1]

## Dispersive Magnetic Solid-Phase Extraction as a Novelty Sample Treatment for the Determination of the Main Aflatoxins in Paprika

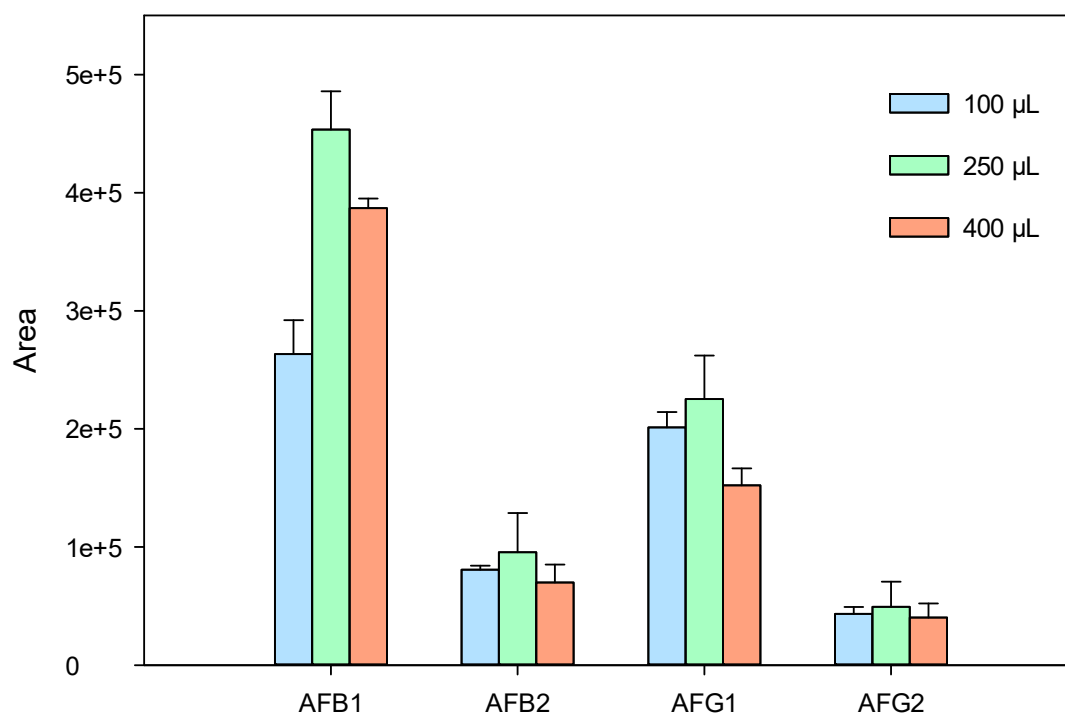

**Figure S1.** Influence of the  $\text{Fe}_3\text{O}_4@\text{PPy}$  suspension volume on the sensitivity of the analytes.

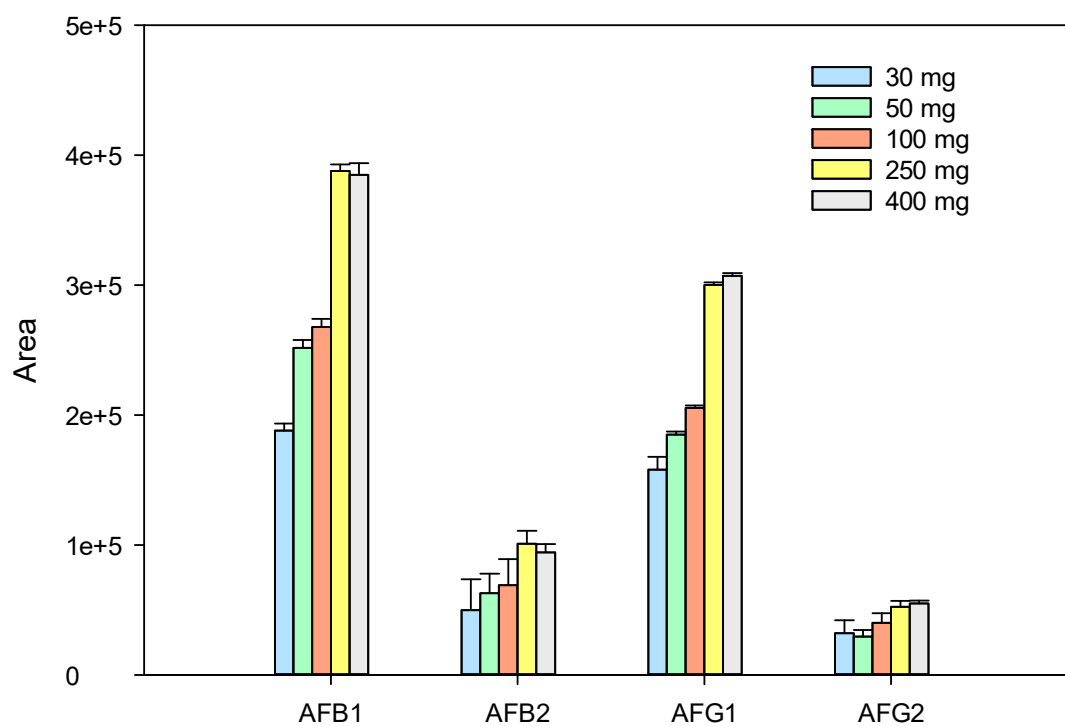

**Figure S2.** Influence of the  $\text{Fe}_3\text{O}_4@\text{PPy}$  mass on the sensitivity of the analytes.

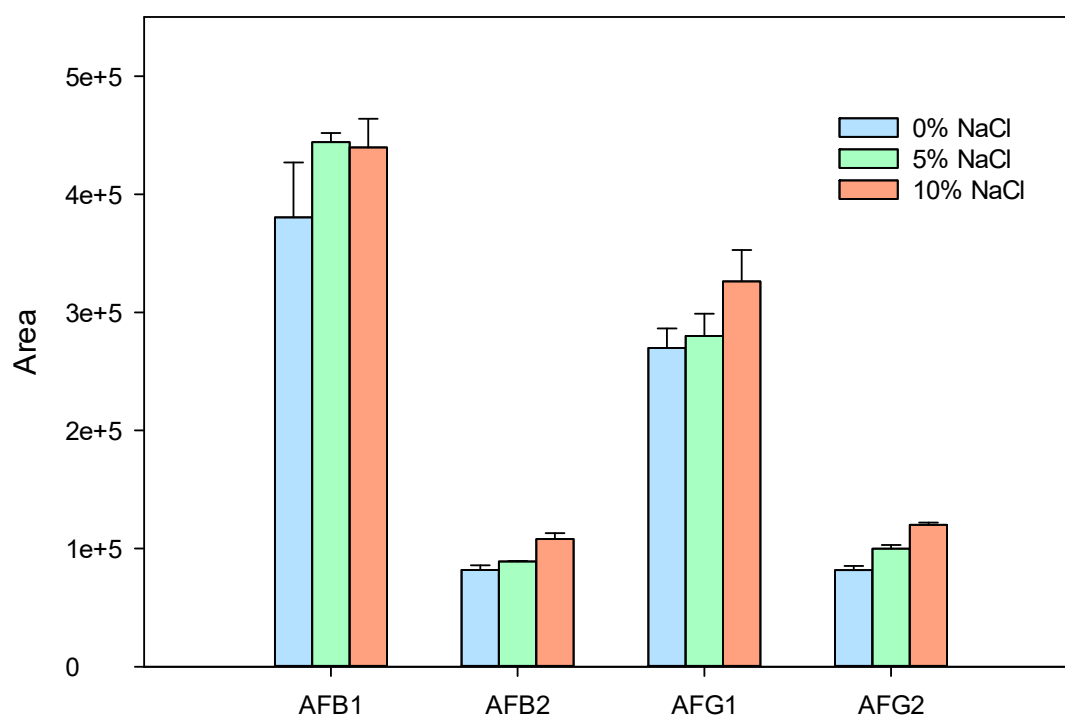

**Figure S3.** Influence of the NaCl content in the extraction medium on AFBs pre-concentration efficiency.

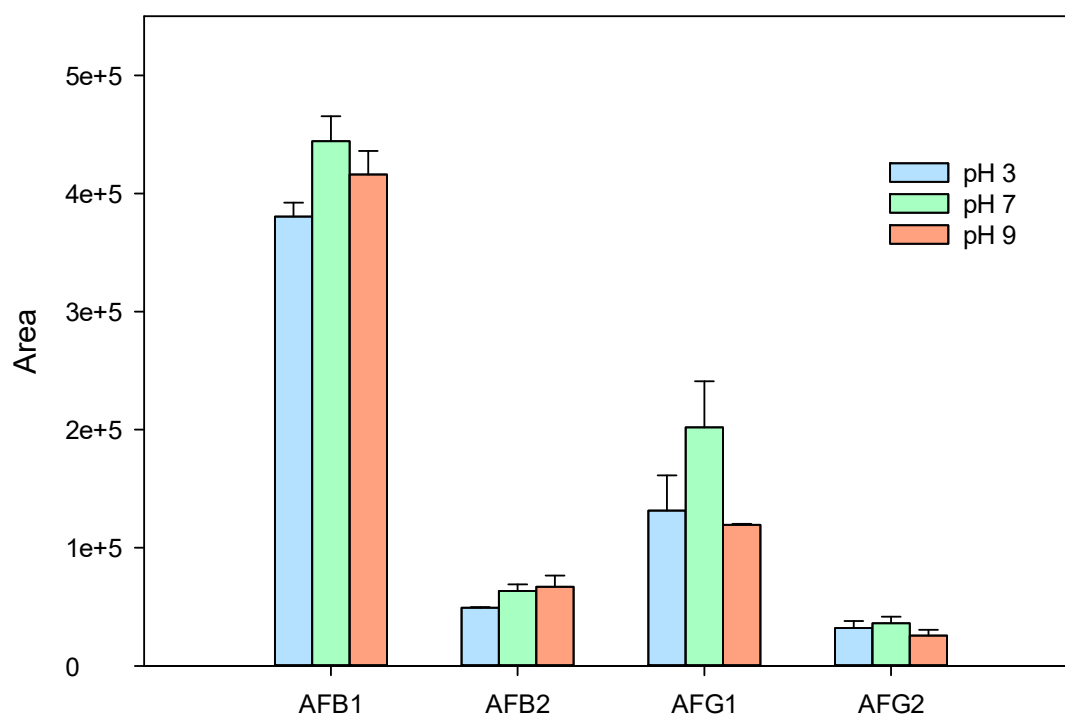

**Figure S4.** Influence of the pH on AFs preconcentration efficiency.

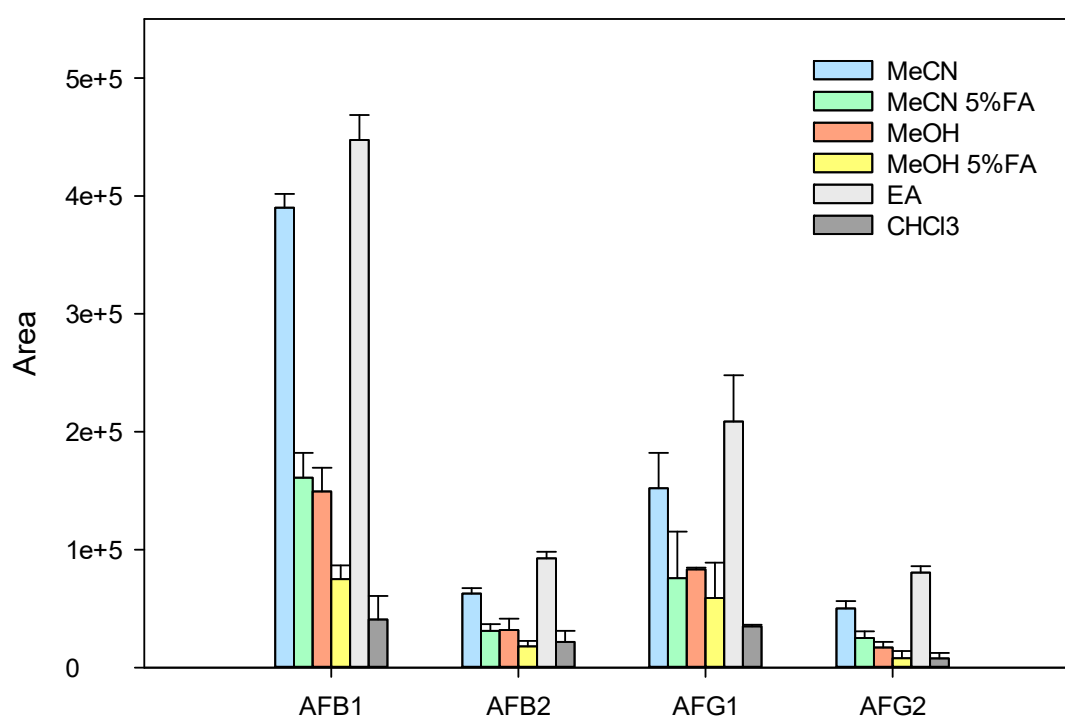

**Figure S5.** Influence of the desorption solvent nature on AFs preconcentration efficiency.

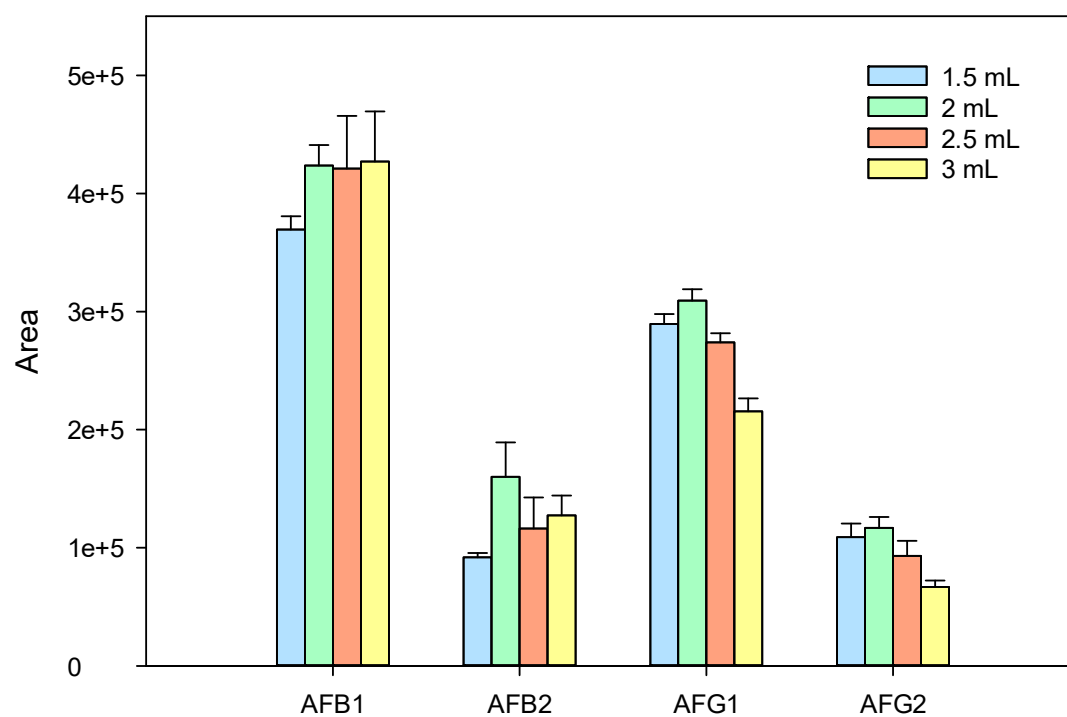

**Figure S6.** Influence of the desorption solvent volume on AFs preconcentration efficiency.

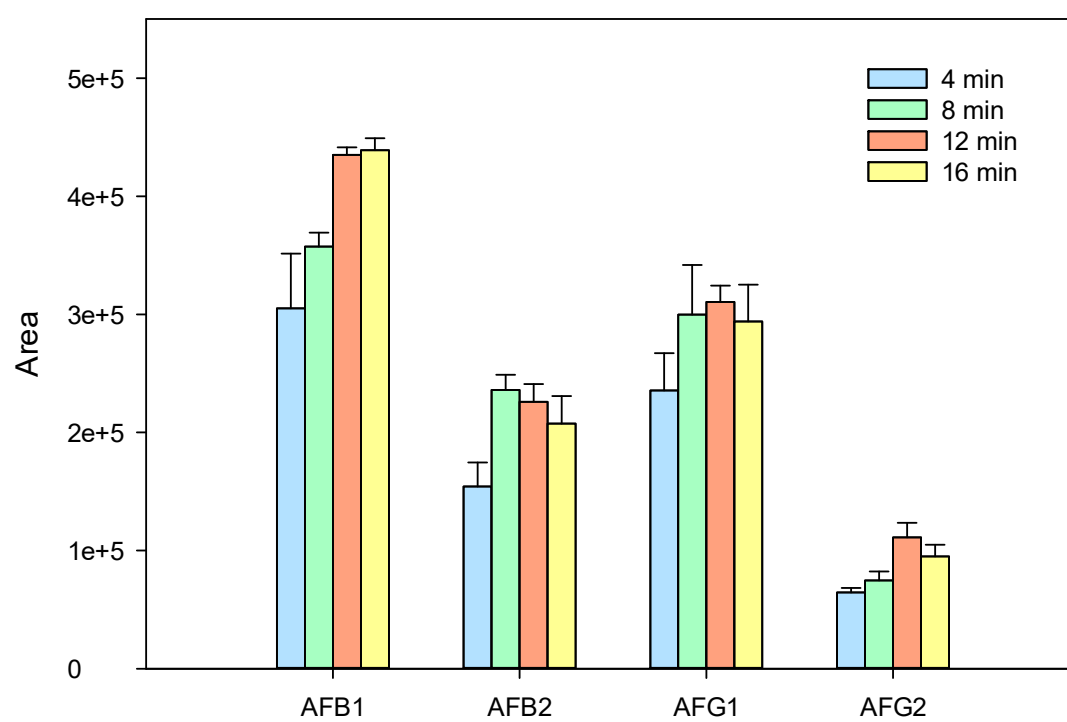

**Figure S7.** Influence of the desorption time on AFs preconcentration efficiency.

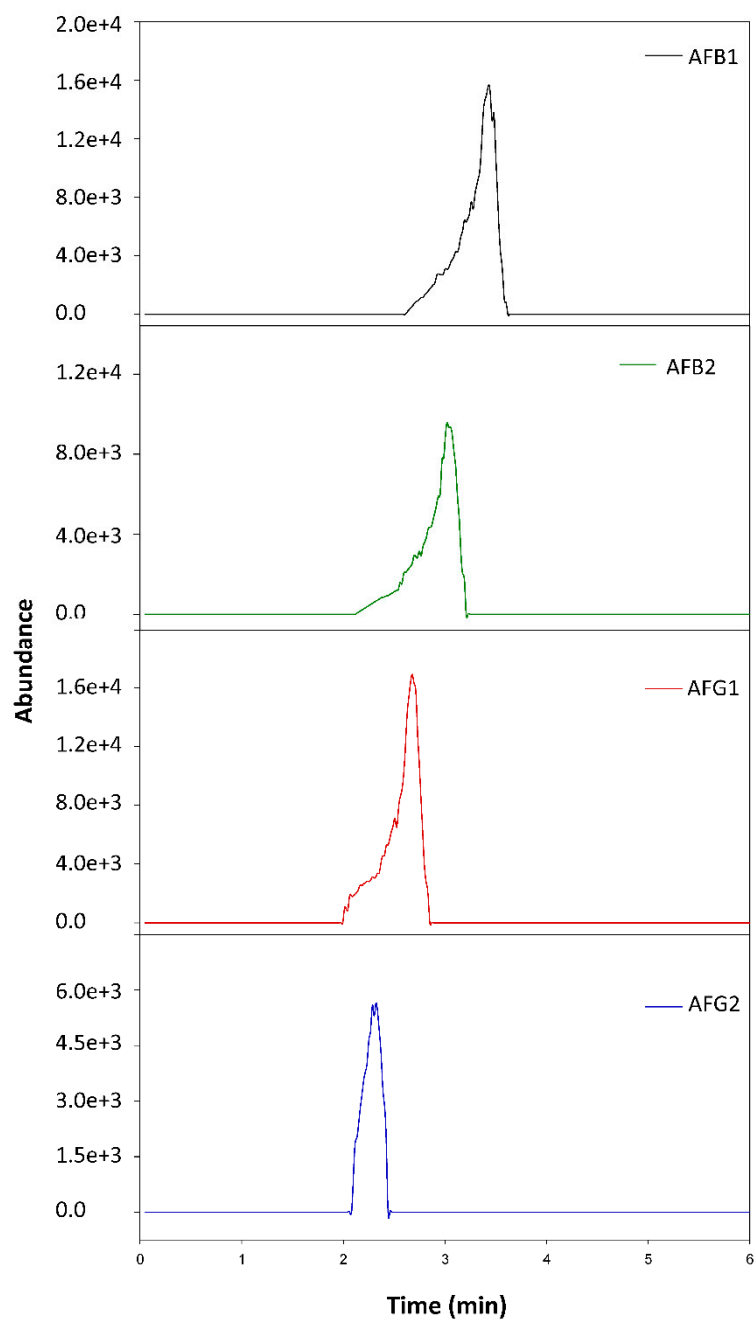

**Figure S8.** LC-HRMS chromatogram of AFB1, AFB2, AFG1 and AFG2 in spiked paprika at 10  $\mu\text{g kg}^{-1}$ .

**Table S1.** Comparison of the novel proposed method with other methods for the determination of AFs in food samples.

| AFs                     | Matrix                     | NPs type                                                   | Determination technique | Sorbent amount | Method time | Organic solvent consumed                                                                                                                                      | Linearity                                                                         | Recovery (%)   | RSD (%)      | LOD                                         | Ref                                                                                                     |
|-------------------------|----------------------------|------------------------------------------------------------|-------------------------|----------------|-------------|---------------------------------------------------------------------------------------------------------------------------------------------------------------|-----------------------------------------------------------------------------------|----------------|--------------|---------------------------------------------|---------------------------------------------------------------------------------------------------------|
| B1 B2 G1<br>G2          | Fruit                      | HB-Zn/Co-ZIF-8                                             | UHPLC-IT-MS             | 40 mg          | 60 min      | 150 $\mu$ L of 0.1%FA-ACN                                                                                                                                     | 5-100 ng mL <sup>-1</sup> (B1, G1,<br>G2)<br>1-50 ng mL <sup>-1</sup> (B2)        | 75.1-<br>102.4 | 5.3-<br>13.6 | 0.18-1.50<br>ng mL <sup>-1</sup>            | (Wang et al.,<br>2020)<br><br>(Karami-<br>Osboo,<br>Ahmadpoor,<br>Nasrollahzade<br>h, & Maham,<br>2022) |
| B1 B2 G1<br>G2          | Pistachio                  | Sp-M-Dp                                                    | HPLC-FLD                | 150 mg         | 20 min      | 1 mL ACN                                                                                                                                                      | 2-10 ng g <sup>-1</sup>                                                           | 72.0-<br>95.6  | 5.6-<br>7.3  | 0.02-0.07<br>ng g <sup>-1</sup>             | (Liu et al.,<br>2018)                                                                                   |
| B1 B2                   | Maize                      | MAMs                                                       | HPLC-PCD-FLD            | NI             | 7 min       | 5 mL of BB and 1 mL of<br>eluting buffer/MeOH<br>(20:80, v/v)                                                                                                 | 0.5-50 $\mu$ g kg <sup>-1</sup>                                                   | 83.6-<br>97.8  | 1.6-<br>8.00 | 10-25<br>pg mL <sup>-1</sup>                | (Hanif,<br>Allahyari,<br>Pourghazi, &<br>Amoli-diva,<br>2015)                                           |
| B1 B2<br>G1 G2          | Wheat                      | EGBMA-TEOS-<br>MNPs                                        | IAC-HPLC-FLD            | 100 mg         | 12 min      | 2 mL of a mixture of<br>Me <sub>2</sub> CO/MeCN/CH <sub>2</sub> Cl <sub>2</sub><br>(1:1:2, v/v) and 2 mL of<br>0.5 mM Triton X-100 in<br>15% (v/v) ACN/water. | 0.1-50<br>ng mL <sup>-1</sup>                                                     | 92.0-<br>105.0 | 0.8-<br>2.6  | 0.03<br>ng mL <sup>-1</sup>                 | (Li, Zhang, &<br>Shi, 2018)                                                                             |
| B1                      | Wheat                      | Fe <sub>3</sub> O <sub>4</sub> -<br>MWCNTs-NH <sub>2</sub> | HPLC-DAD                | 6 mg           | 40 min      | 0.2 mL of Me <sub>2</sub> CO                                                                                                                                  | 1-100 ng g <sup>-1</sup>                                                          | 88.8-<br>96.0  | 2.1-<br>2.8  | 0.15<br>ng g <sup>-1</sup>                  | (Hashemi &<br>Taherimaslak,<br>2014)                                                                    |
| B1 B2 G1<br>G2          | Pistachio                  | AMT-TMSPT-<br>MNPs                                         | HPLC -FLD               | 150 mg         | 8 min       | 2 mL<br>Me <sub>2</sub> CO/MeCN/CH <sub>2</sub> Cl <sub>2</sub><br>(1:1:2, v/v/v)                                                                             | 0.10-15 ng mL <sup>-1</sup><br>(B1, G1)<br>0.04-3 ng mL <sup>-1</sup><br>(B2, G2) | 92.5-<br>103.2 | 2.3-<br>5.9  | 0.014-<br>0.037<br>$\mu$ g kg <sup>-1</sup> | (Alilou,<br>Amirzehni, &<br>Eslami, 2021)                                                               |
| M2 M1<br>G2 G1 B2<br>B1 | Rice and<br>wheat<br>flour | MIP-capped<br>MGO/MOF-808                                  | HPLC-FID                | 5 mg           | 25 min      | 0.5 mL ACN, 300 $\mu$ L<br>phosphate buffer (0.2 M,<br>pH 7)<br>and 250 $\mu$ L GQDs.                                                                         | 0.03-5<br>ng mL <sup>-1</sup>                                                     | 97.3-<br>98.6  | 0.9-<br>2.9  | 0.009-<br>3.69<br>ng mL <sup>-1</sup>       |                                                                                                         |

|                |           |                                                                                      |            |        |        |                                                                                 |                                                                                                                                                  |               |              |                                     |                                              |
|----------------|-----------|--------------------------------------------------------------------------------------|------------|--------|--------|---------------------------------------------------------------------------------|--------------------------------------------------------------------------------------------------------------------------------------------------|---------------|--------------|-------------------------------------|----------------------------------------------|
| B1 B2 G1<br>G2 | Pistachio | MIL-101(Cr)<br>MIL-101(Cr)/Fe <sub>3</sub> O <sub>4</sub> @S<br>iO <sub>2</sub> @PTU | HPLC-FLD   | 60 mg  | 6 min  | 215 µL CH <sub>2</sub> Cl <sub>2</sub> /ACN/<br>Me <sub>2</sub> CO (2:1:1, v/v) | 0.2-4 ng g <sup>-1</sup> (B1, G1)<br>0.1-3.5 ng g <sup>-1</sup> B2<br>0.3-04 ng g <sup>-1</sup> G2                                               | 93.4-<br>97.8 | 6.4-<br>12.8 | 0.02-<br>0.09<br>ng g <sup>-1</sup> | (Bagher,<br>Hamid, &<br>Ghasempour,<br>2020) |
| B1 B2 G1<br>G2 | Paprika   | Fe <sub>3</sub> O <sub>4</sub> @PPy                                                  | UHPLC-HRMS | 244 mg | 42 min | 2 mL of EA                                                                      | 3.7 – 50 µg kg <sup>-1</sup> (B1)<br>3.9 – 50 µg kg <sup>-1</sup> (B2)<br>3.5 – 50 µg kg <sup>-1</sup> (G1)<br>4.7 – 50 µg kg <sup>-1</sup> (G2) | 81.9-<br>99.4 | 5.3-<br>7.8  | 1.0 - 1.4<br>µg kg <sup>-1</sup>    | This work                                    |

**Table S2.** Validation data for the determination of aflatoxins in paprika using HPLC-MS/MS.

| Mycotoxin | Equation            | Linearity<br>( $\mu\text{g kg}^{-1}$ ) | Linearity<br>$R^2$ | LOD<br>( $\mu\text{g kg}^{-1}$ ) | LOQ<br>( $\mu\text{g kg}^{-1}$ ) | Matrix effect<br>(%) |
|-----------|---------------------|----------------------------------------|--------------------|----------------------------------|----------------------------------|----------------------|
| AFB1      | $y = 2624 x + 1521$ | 2.3 - 50                               | 0.992              | 0.7                              | 2.3                              | 61.9                 |
| AFB2      | $y = 639.5 x + 173$ | 3.0 - 50                               | 0.997              | 0.9                              | 3.0                              | 61.1                 |
| AFG1      | $y = 2232 x + 302$  | 2.2 - 50                               | 0.988              | 0.7                              | 2.2                              | 63.2                 |
| AFG2      | $y = 373.6 x + 108$ | 2.5 - 50                               | 0.998              | 0.8                              | 2.5                              | 60.1                 |

**Table S3.** AFs and their derivatives investigated using untargeted processing.

| Aflatoxin                               | Molecular Formula                      | <i>m/z</i> |
|-----------------------------------------|----------------------------------------|------------|
| Aflatoxin B2a                           | $\text{C}_{17}\text{H}_{14}\text{O}_7$ | 330.0739   |
| Aflatoxin G2a                           | $\text{C}_{17}\text{H}_{14}\text{O}_8$ | 346.0689   |
| Aflatoxin GM1                           | $\text{C}_{17}\text{H}_{12}\text{O}_8$ | 344.0532   |
| Aflatoxin M1                            | $\text{C}_{17}\text{H}_{12}\text{O}_7$ | 328.0583   |
| Aflatoxin M2                            | $\text{C}_{17}\text{H}_{14}\text{O}_7$ | 330.0739   |
| Aflatoxin M2a                           | $\text{C}_{17}\text{H}_{14}\text{O}_8$ | 346.0689   |
| Aflatoxin M4                            | $\text{C}_{17}\text{H}_{12}\text{O}_7$ | 328.0583   |
| Aflatoxin P1                            | $\text{C}_{16}\text{H}_{10}\text{O}_6$ | 298.0477   |
| Aflatoxin P2                            | $\text{C}_{16}\text{H}_{12}\text{O}_6$ | 300.0634   |
| Aflatoxin Q1                            | $\text{C}_{17}\text{H}_{12}\text{O}_7$ | 328.0583   |
| Aflatoxin Q2a                           | $\text{C}_{17}\text{H}_{14}\text{O}_8$ | 346.0689   |
| Aflatoxicol                             | $\text{C}_{17}\text{H}_{14}\text{O}_6$ | 314.0790   |
| Aflatoxicol B                           | $\text{C}_{17}\text{H}_{14}\text{O}_6$ | 314.0790   |
| Aflatoxicol H1                          | $\text{C}_{17}\text{H}_{14}\text{O}_7$ | 330.0739   |
| Aflatoxicol M1                          | $\text{C}_{17}\text{H}_{14}\text{O}_7$ | 330.0739   |
| <i>Biosynthesis pathway metabolites</i> |                                        |            |
| Sterigmatocystin                        | $\text{C}_{18}\text{H}_{12}\text{O}_6$ | 325.0707   |
| O-methyl-sterigmatocystin               | $\text{C}_{19}\text{H}_{14}\text{O}_6$ | 339.0863   |
| Dihydrosterigmatocystin                 | $\text{C}_{18}\text{H}_{14}\text{O}_6$ | 327.0863   |
| Dihydro-O-methylsterigmatocystin        | $\text{C}_{19}\text{H}_{16}\text{O}_6$ | 341.1020   |
| <i>Degradation products</i>             |                                        |            |
| DP1                                     | $\text{C}_{16}\text{H}_{12}\text{O}_4$ | 269.0808   |
| DP2                                     | $\text{C}_{17}\text{H}_{10}\text{O}_6$ | 311.0550   |
| DP3                                     | $\text{C}_{17}\text{H}_{10}\text{O}_7$ | 327.0499   |
| DP4                                     | $\text{C}_{17}\text{H}_{16}\text{O}_6$ | 317.1020   |
| DP5                                     | $\text{C}_{16}\text{H}_{12}\text{O}_6$ | 301.0707   |
| DP6                                     | $\text{C}_{16}\text{H}_6\text{O}_5$    | 279.0288   |
| DP7                                     | $\text{C}_{16}\text{H}_{10}\text{O}_5$ | 283.0601   |
| DP8                                     | $\text{C}_{16}\text{H}_{22}\text{O}_5$ | 295.1540   |
| DP9                                     | $\text{C}_{16}\text{H}_{20}\text{O}_5$ | 293.1384   |
| DP10                                    | $\text{C}_{16}\text{H}_{20}\text{O}_6$ | 309.1333   |

|      |                                                |          |
|------|------------------------------------------------|----------|
| DP11 | C <sub>16</sub> H <sub>18</sub> O <sub>6</sub> | 307.1176 |
| DP12 | C <sub>16</sub> H <sub>16</sub> O <sub>7</sub> | 321.0929 |

**Table S4.** UHPLC-HRMS parameters of the target aflatoxins.

| <b>Compound</b> | <b>RT<sup>a</sup><br/>(min)</b> | <b>Formula</b>                                 | <b>Precursor<br/>ion (<i>m/z</i>)</b> | <b>Error<br/>(ppm)</b> | <b>Product<br/>ion 1 (<i>m/z</i>)</b> | <b>Product<br/>ion 2 (<i>m/z</i>)</b> |
|-----------------|---------------------------------|------------------------------------------------|---------------------------------------|------------------------|---------------------------------------|---------------------------------------|
| AFG2            | 2.319                           | C <sub>17</sub> H <sub>14</sub> O <sub>7</sub> | 331.0812                              | 1.3                    | 245.1                                 | 313.1                                 |
| AFG1            | 2.679                           | C <sub>17</sub> H <sub>12</sub> O <sub>7</sub> | 329.0656                              | -0.37                  | 243.1                                 | 311.1                                 |
| AFB2            | 3.021                           | C <sub>17</sub> H <sub>14</sub> O <sub>6</sub> | 315.0863                              | -0.59                  | 286.9                                 | 259                                   |
| AFB1            | 3.432                           | C <sub>17</sub> H <sub>12</sub> O <sub>6</sub> | 313.0707                              | -0.75                  | 241                                   | 284.9                                 |

<sup>a</sup>RT: retention time
